# Supplementary material
Source: Royal Society of Chemistry journal article supplement (https://www.rsc.org/suppdata/cc/1999/1529/903911b.doc)

**Supplementary data**

**Single-electron reduction of C60 with a carbon radical:**

**formation of the crystal violet cation–fulleride ion salt**

Toshikazu Kitagawa, Yangsoo Lee and Ken’ichi Takeuchi

*Procedure for the preparation of* ***1****+C60•–*

The apparatus shown in Figure 1 was used. Pyridine (0.1 ml), hexane (1.2 ml) and CS2 (5 ml) were degassed in flasks E, F and G, respectively, by three freeze-pump-thaw cycles. Crystal violet iodide (2.05 mg, 4.10 mol) and zinc powder (25 mg, 0.38 mmol) were placed in chamber A. In chamber B was introduced 2.86 mg (3.97 mol) of C60. The upper ends of the both chambers were then sealed. The apparatus was evacuated by opening stopcocks *a*, *c* and *g*. The solvent to be used for the spectroscopic measurement (THF or CD2Cl2) was degassed in chamber C, and stopcock *b* was closed. With stopcock *g* closed and *d* open, the pyridine was transferred to chamber A by vacuum distillation. Stopcock *a* was closed, and the mixture in chamber A was stirred at room temperature. After 10 min, a red solution of the crystal violet radical **1**• was obtained. Stopcocks *a* and *e* were then opened, and the hexane was added to the red solution by vacuum distillation. The pyridine complex of ZnI2 was precipitated in chamber A. The CS2 in flask G was vacuum distilled to chamber B, dissolving the C60. Stopcocks *a* and *c* were closed, and the apparatus was disconnected at the joint *p*. By tilting the apparatus, the solution in chamber A was filtered through the glass frit and added to the solution in B with stirring. The salt **1**+C60•– immediately crystallized. The apparatus was then tilted in the opposite direction to allow the reaction mixture to be filtered through the glass frit. The salt, collected on the left-hand side of the glass frit, was washed three times with small amounts of CS2 to remove unreacted C60. After chamber A had been cooled with liq. N2 for 30 min to completely remove the solvent from the collected crystals, chamber A was sealed off at position *q*. For the preparation of solutions for spectrometry, a suitable amount of the obtained crystals were transferred to tube D and dissolved in the solvent, which was introduced from chamber C by vacuum distillation.


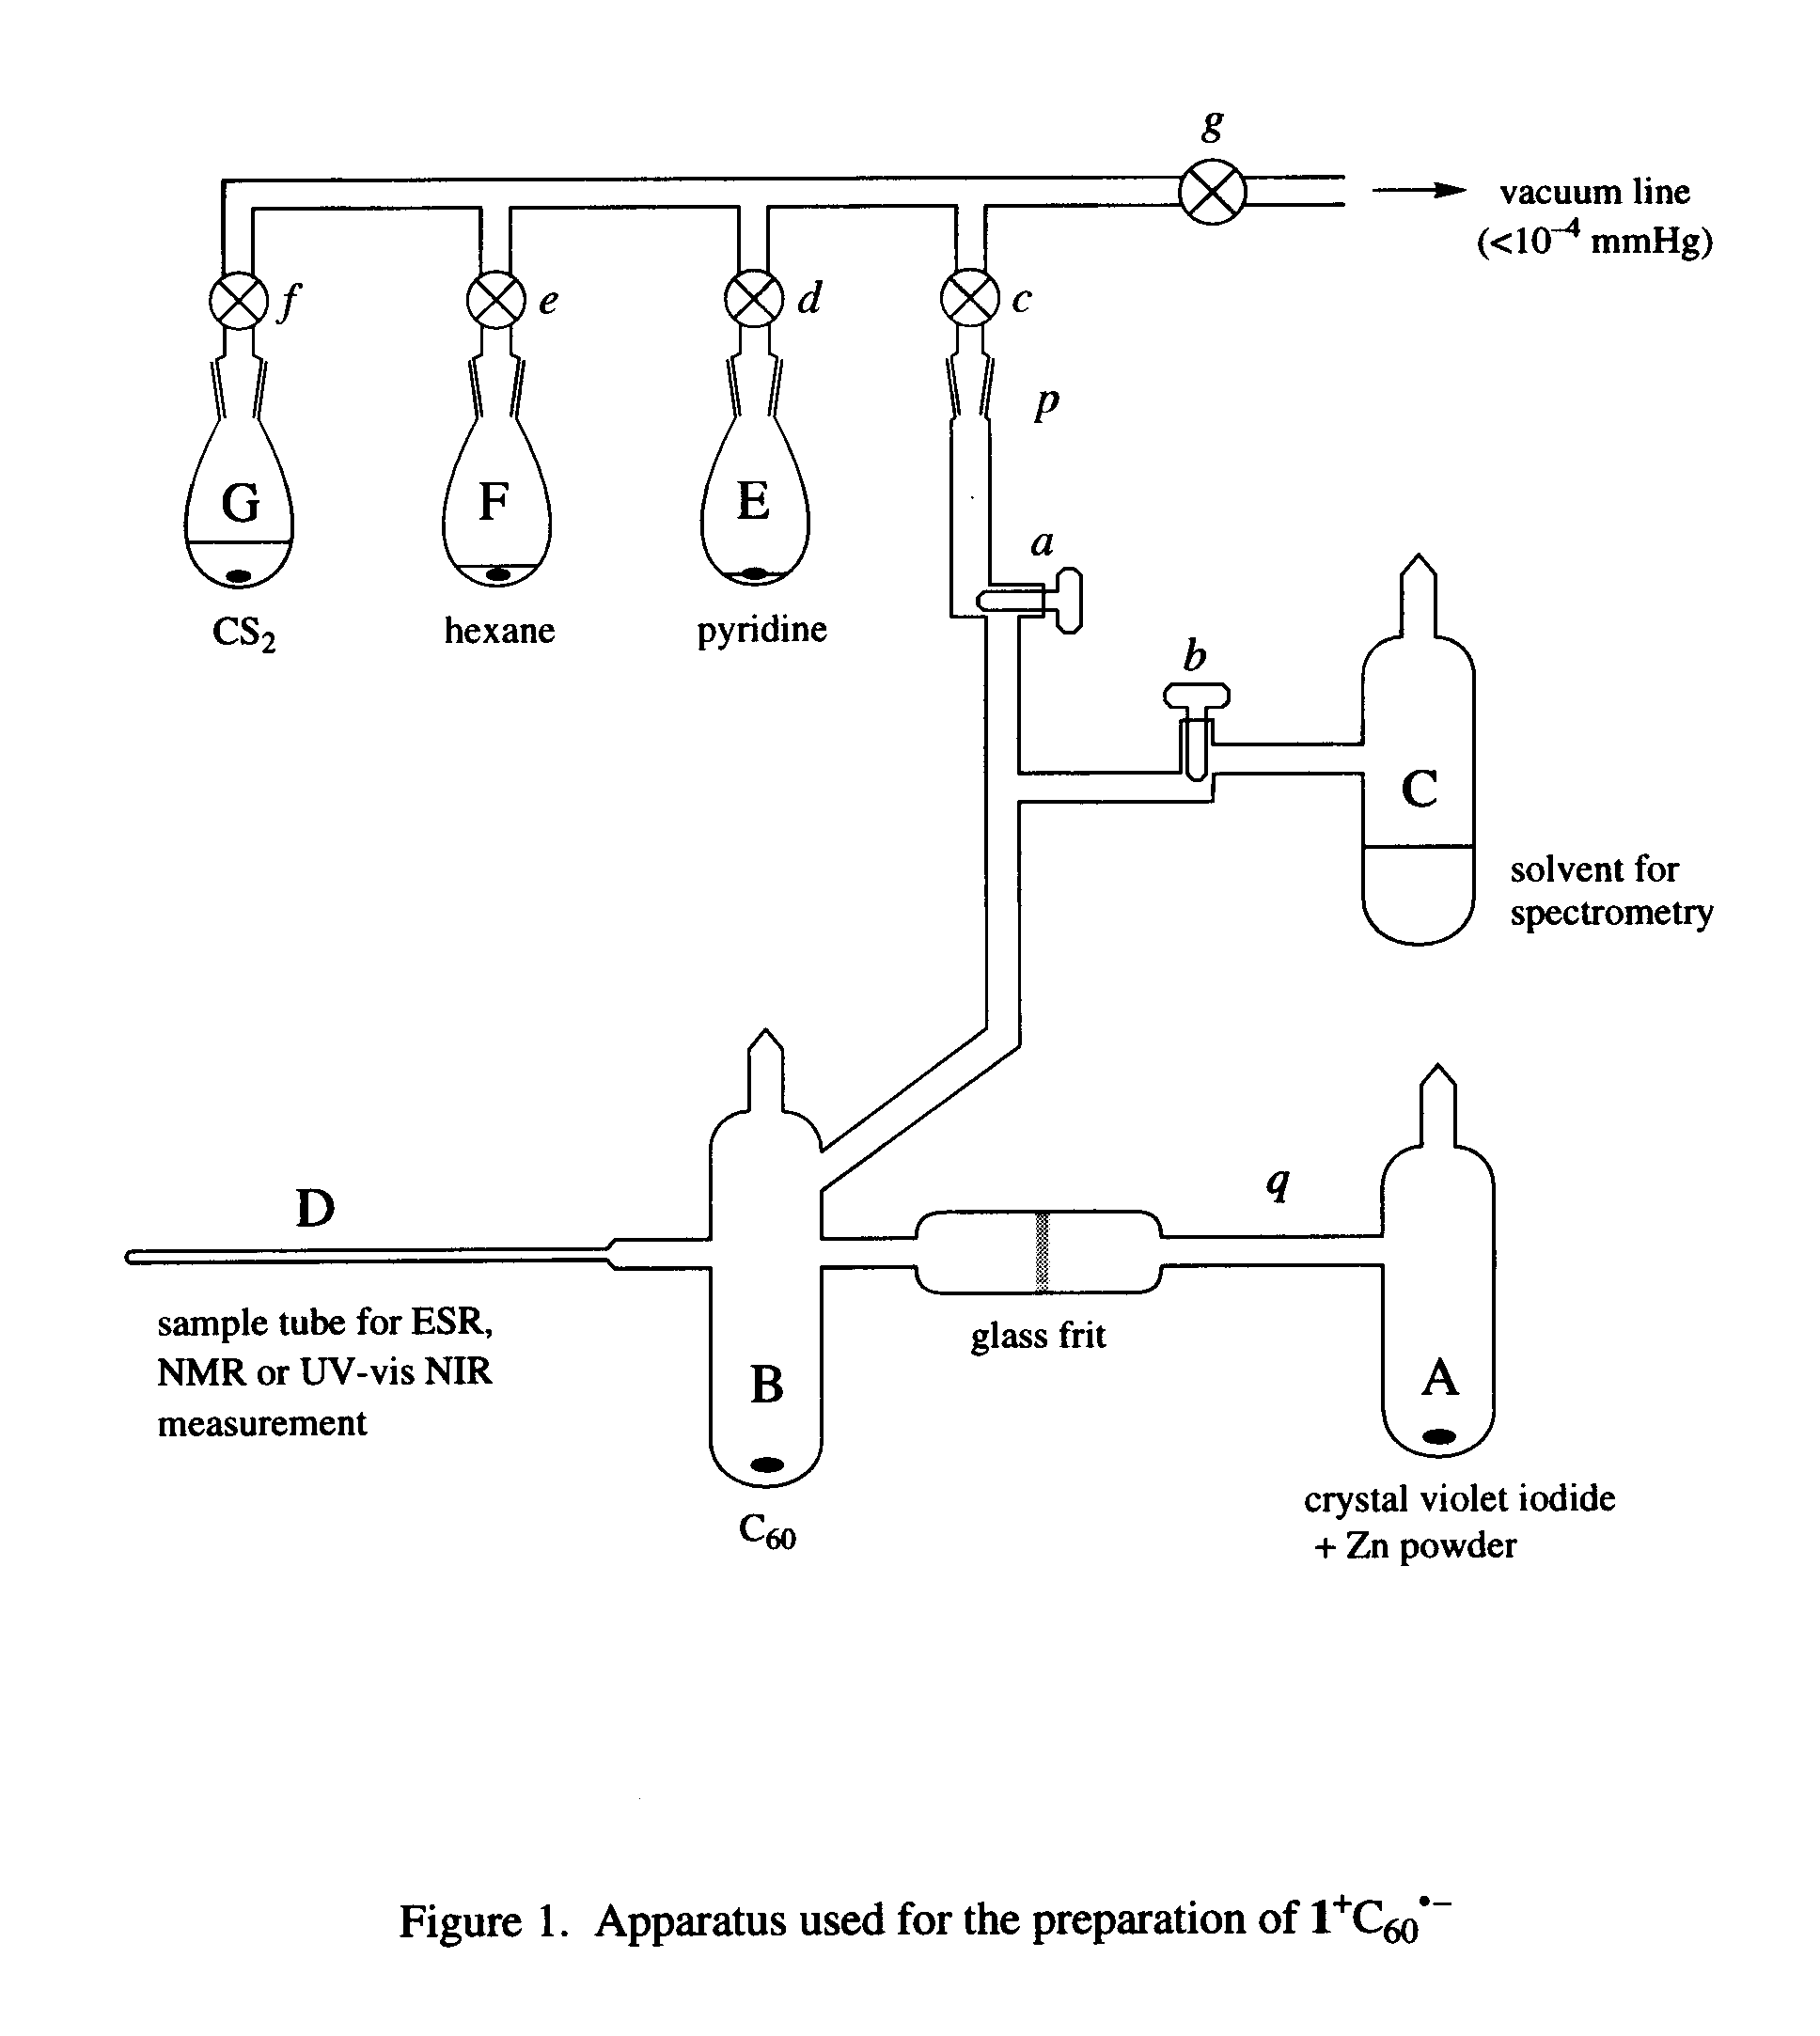


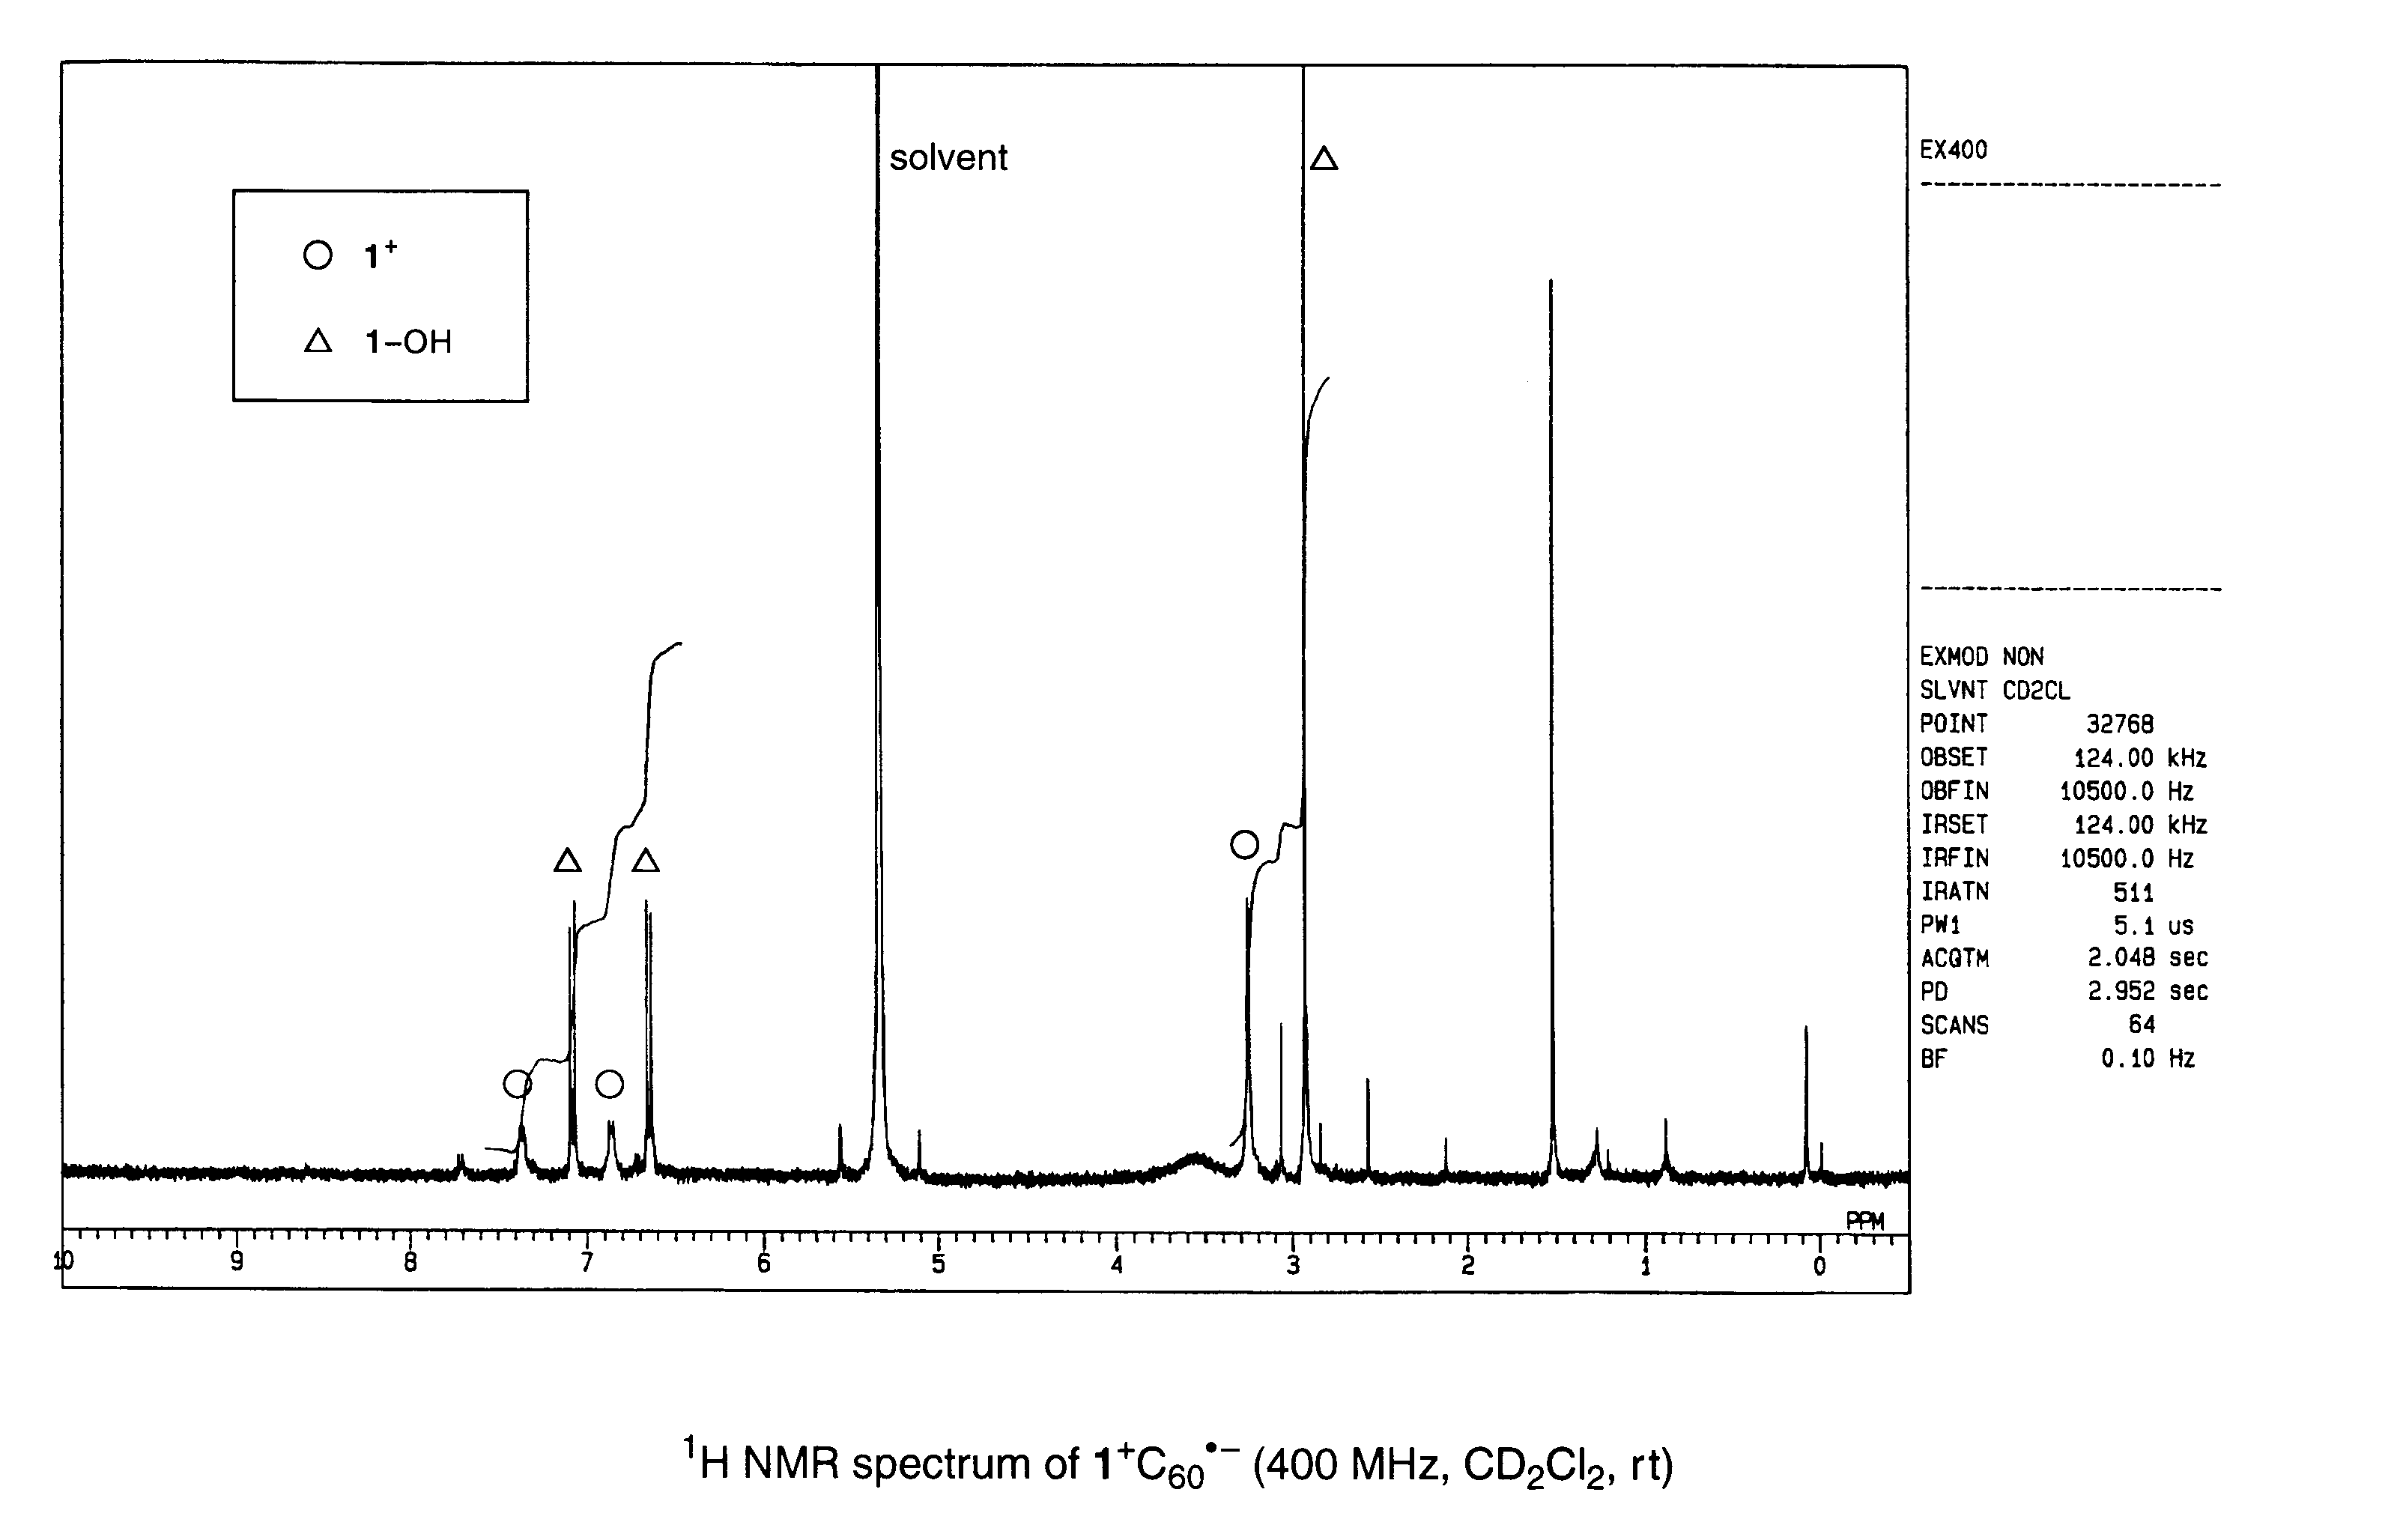

Supplement: Supplementary file 1 [file 903911b.doc]
